# Supplementary material
Source: MDPI journal article supplement (https://www.mdpi.com/2073-4441/14/15/2287)
Supplement: s1 [file s1]

# Assessment of water quality indicators in the Orla River nitrate vulnerable zone in the context of new threats in Poland

Jerzy Mirosław Kupiec <sup>1\*</sup>, Ryszard Staniszewski, <sup>1</sup> and Dariusz Kayzer <sup>2</sup>

<sup>1</sup> Department of Ecology and Environmental Protection, Poznań University of Life Sciences, Piatkowska 94C, 60-649 Poznań Poland; ryszard.staniszewski@up.poznan.pl

<sup>2</sup> Department of Mathematical and Statistical Methods, Poznań University of Life Sciences, Wojska Polskiego 28, 60-637 Poznań, Poland; dariusz.kayzer@up.poznan.pl

\* Correspondence: jerzy.kupiec@up.poznan.pl

**Table S1.** Flows from the multiannual period from 1981 to 2010 (1) and specific flows in moderately dry years (2) at the Korzeńsko gauge cross-section

| No. | Catchment area<br>[km <sup>2</sup> ] | Flows*                                    |                                           |                                           |                                           |
|-----|--------------------------------------|-------------------------------------------|-------------------------------------------|-------------------------------------------|-------------------------------------------|
|     |                                      | QN*<br>[m <sup>3</sup> ·s <sup>-1</sup> ] | NNQ<br>[m <sup>3</sup> ·s <sup>-1</sup> ] | SNQ<br>[m <sup>3</sup> ·s <sup>-1</sup> ] | SSQ<br>[m <sup>3</sup> ·s <sup>-1</sup> ] |
| 1   | 1224.77                              | 0.24                                      | 0.06                                      | 0.32                                      | 4.46                                      |
| 2   |                                      | 0.13                                      | 0.07                                      | 0.16                                      | 1.43                                      |

\*QN, inviolable flow determined using the simplified method of Kostrzewa [42] according to the hydrobiological criterion; NNQ, the lowest annual flows in the multiannual period; SNQ, mean low annual flows in the multiannual period; SSQ, mean flows in the multiannual period

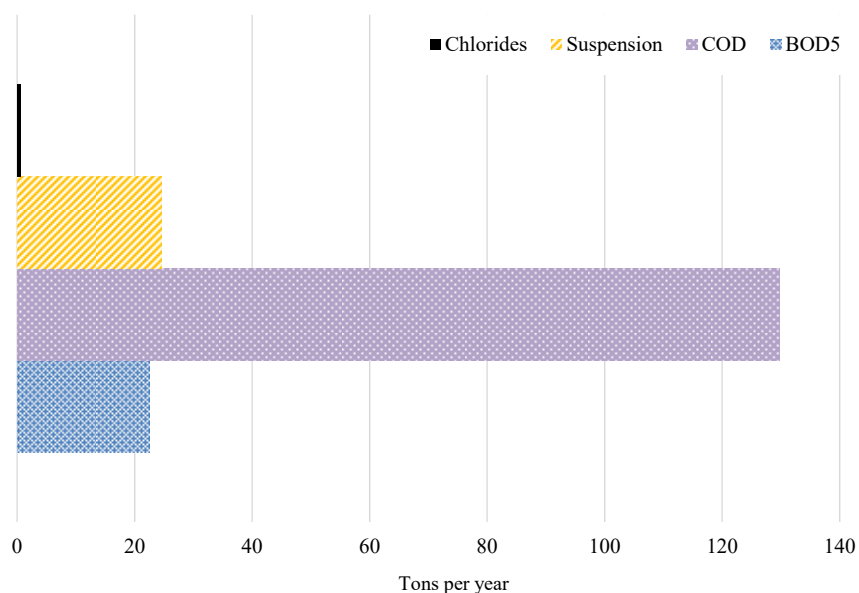

**Figure S1.** Selected pollutant loads carried with the discharge of treated water from treatment plants located in the Orla River catchment

**Table S2.** Correlation coefficients of the studied physicochemical parameters and the area of livestock buildings in selected buffers

| Parameter             | Building area |               | Phosphorus content in soil | Potassium content in soil |
|-----------------------|---------------|---------------|----------------------------|---------------------------|
|                       | [1 km buffer] | [3 km buffer] |                            |                           |
| pH                    | -0.747        | -0.703        | 0.056                      | 0.127                     |
| Temperature           | -0.334        | -0.324        | 0.205                      | 0.117                     |
| Conductivity (EC)     | 0.036         | 0.160         | -0.513                     | -0.158                    |
| Phosphates (SRP)      | 0.564         | 0.107         | -0.427                     | -0.328                    |
| Total phosphorus (TP) | 0.644         | 0.310         | -0.383                     | -0.407                    |
| Nitrite nitrogen      | 0.486         | 0.351         | -0.365                     | 0.040                     |
| Nitrate nitrogen      | -0.446        | 0.264         | -0.188                     | 0.408                     |
| Ammonium nitrogen     | 0.573         | -0.249        | -0.318                     | -0.276                    |
| Organic nitrogen      | 0.768         | 0.409         | -0.205                     | -0.238                    |
| Total nitrogen (TN)   | 0.716         | 0.487         | -0.270                     | -0.221                    |
| Potassium             | -0.233        | 0.474         | -0.291                     | -0.394                    |
| Calcium               | -0.007        | -0.179        | -0.512                     | -0.121                    |
| Dissolved oxygen (DO) | -0.507        | 0.447         | 0.255                      | 0.066                     |

**Table S3.** Correlation coefficients of the studied physicochemical parameters during seasons and the area of livestock buildings within the 1 km buffer

| Parameter             | Spring                              | Summer | Autumn | Winter |
|-----------------------|-------------------------------------|--------|--------|--------|
|                       | Area of building [1 km buffer zone] |        |        |        |
| pH                    | -0.635                              | -0.207 | -0.541 | -0.686 |
| Temperature           | -0.634                              | -0.138 | -0.091 | 0.097  |
| Conductivity (EC)     | 0.332                               | -0.143 | -0.187 | 0.313  |
| Phosphates (SRP)      | -0.106                              | 0.513  | 0.905  | 0.318  |
| Total phosphorus (TP) | 0.141                               | 0.536  | 0.913  | 0.311  |
| Nitrite nitrogen      | -0.165                              | -0.325 | -0.044 | 0.949  |
| Nitrate nitrogen      | -0.111                              | -0.223 | -0.481 | -0.219 |
| Ammonium nitrogen     | 0.197                               | 0.304  | 0.837  | 0.735  |
| Organic nitrogen      | 0.032                               | 0.132  | 0.810  | 0.981  |
| Total nitrogen (TN)   | 0.077                               | 0.417  | 0.917  | 0.895  |
| Potassium             | -0.204                              | -0.337 | -0.136 | -0.055 |
| Calcium               | -0.245                              | -0.064 | 0.059  | 0.248  |
| Dissolved oxygen (DO) | -0.312                              | -0.260 | -0.497 | -0.760 |

**Table S4.** Correlation coefficients of the studied physicochemical parameters during seasons and the area of livestock buildings within the 3 km buffer

| Parameter             | Spring                              | Summer | Autumn | Winter |
|-----------------------|-------------------------------------|--------|--------|--------|
|                       | Area of building [3 km buffer zone] |        |        |        |
| pH                    | -0.702                              | -0.090 | -0.485 | -0.681 |
| Temperature           | -0.448                              | -0.096 | -0.054 | -0.282 |
| Conductivity          | 0.576                               | -0.108 | 0.055  | 0.251  |
| Phosphates (SRP)      | -0.219                              | 0.253  | 0.680  | 0.176  |
| Total phosphorus (TP) | -0.010                              | 0.242  | 0.646  | 0.169  |
| Nitrite nitrogen      | -0.150                              | -0.222 | -0.122 | 0.611  |
| Nitrate nitrogen      | -0.118                              | -0.287 | -0.410 | 0.132  |
| Ammonium nitrogen     | 0.079                               | 0.156  | 0.732  | 0.551  |
| Organic nitrogen      | -0.030                              | -0.013 | 0.738  | 0.611  |
| Total nitrogen (TN)   | -0.008                              | 0.194  | 0.734  | 0.628  |
| Potassium             | -0.259                              | -0.315 | 0.131  | -0.230 |
| Calcium               | 0.140                               | 0.140  | 0.573  | 0.627  |
| Dissolved oxygen (DO) | -0.432                              | 0.118  | -0.494 | -0.391 |

**Table S5.** Mahalanobis distances between monitoring points.

|     |       |       |       |       |       |       |       |       |       |       |       |      |       |       |       |       |  |  |  |
|-----|-------|-------|-------|-------|-------|-------|-------|-------|-------|-------|-------|------|-------|-------|-------|-------|--|--|--|
| O2  | 3.33  |       |       |       |       |       |       |       |       |       |       |      |       |       |       |       |  |  |  |
| O3  | 11.70 | 7.16  |       |       |       |       |       |       |       |       |       |      |       |       |       |       |  |  |  |
| O4  | 7.41  | 5.37  | 1.74  |       |       |       |       |       |       |       |       |      |       |       |       |       |  |  |  |
| O5  | 9.87  | 5.70  | 1.83  | 1.33  |       |       |       |       |       |       |       |      |       |       |       |       |  |  |  |
| O6  | 4.69  | 4.82  | 7.47  | 5.28  | 6.48  |       |       |       |       |       |       |      |       |       |       |       |  |  |  |
| R   | 7.97  | 6.21  | 4.51  | 3.83  | 5.72  | 7.46  |       |       |       |       |       |      |       |       |       |       |  |  |  |
| ZP  | 2.87  | 5.49  | 6.97  | 4.19  | 5.66  | 6.46  | 4.97  |       |       |       |       |      |       |       |       |       |  |  |  |
| O7  | 1.36  | 3.19  | 6.92  | 3.98  | 5.64  | 2.28  | 5.14  | 1.90  |       |       |       |      |       |       |       |       |  |  |  |
| O8  | 3.54  | 8.07  | 11.31 | 7.95  | 10.11 | 7.82  | 10.13 | 2.50  | 3.55  |       |       |      |       |       |       |       |  |  |  |
| O9  | 3.49  | 8.25  | 13.20 | 9.38  | 11.72 | 7.91  | 10.86 | 2.94  | 3.58  | 0.37  |       |      |       |       |       |       |  |  |  |
| SZ  | 5.30  | 6.59  | 9.22  | 7.30  | 9.68  | 10.00 | 8.92  | 3.70  | 5.54  | 2.33  | 3.25  |      |       |       |       |       |  |  |  |
| D   | 4.26  | 7.51  | 9.30  | 7.59  | 9.89  | 5.54  | 3.78  | 3.46  | 2.63  | 6.39  | 6.38  | 8.36 |       |       |       |       |  |  |  |
| M   | 1.98  | 5.04  | 10.24 | 5.98  | 8.87  | 7.17  | 6.46  | 1.92  | 2.44  | 3.73  | 4.12  | 3.13 | 4.35  |       |       |       |  |  |  |
| O10 | 3.79  | 8.36  | 10.81 | 8.10  | 10.87 | 7.15  | 10.44 | 3.23  | 3.57  | 0.72  | 1.04  | 2.67 | 6.24  | 4.11  |       |       |  |  |  |
| O11 | 5.11  | 8.59  | 14.19 | 11.00 | 12.89 | 9.95  | 13.36 | 4.99  | 5.87  | 0.89  | 1.05  | 1.96 | 9.90  | 5.42  | 1.61  |       |  |  |  |
| ZS  | 13.32 | 11.82 | 14.99 | 13.85 | 13.68 | 14.11 | 14.64 | 11.27 | 12.43 | 12.01 | 13.21 | 8.38 | 17.36 | 11.16 | 12.36 | 10.15 |  |  |  |
|     | O1    | O2    | O3    | O4    | O5    | O6    | R     | ZP    | O7    | O8    | O9    | SZ   | D     | M     | O10   | O11   |  |  |  |

**Table S6.** Differences in physicochemical parameters between the mean value of the studied year and the general mean.

| Year | pH     | Temp   | EC     | Alk    | SRP    | TP     | Nitrite | Nitrate | Ammo   | TN     | K      | Ca     | DO     |
|------|--------|--------|--------|--------|--------|--------|---------|---------|--------|--------|--------|--------|--------|
| 2011 | 0.141  | 1.416  | -0.015 | -27.84 | -0.488 | -0.614 | 0.045   | 0.768   | -1.038 | -1.545 | -3.783 | -0.373 | 0.171  |
| 2012 | 0.108  | -0.417 | -0.088 | 26.36  | 1.241  | 1.437  | -0.033  | -0.732  | 1.960  | 5.580  | 1.884  | -1.197 | 0.038  |
| 2014 | -0.248 | -0.999 | 0.102  | 1.48   | -0.754 | -0.823 | -0.013  | -0.035  | -0.922 | -4.035 | 1.899  | 1.570  | -0.209 |

**Table S7.** Differences in physicochemical parameters between the mean value for the season of the year and the overall mean.

| <b>Season<br/>of the<br/>year</b> | <b>pH</b> | <b>Temp</b> | <b>EC</b> | <b>Alk</b> | <b>SRP</b> | <b>TP</b> | <b>Nitrite</b> | <b>Nitrate</b> | <b>Ammo</b> | <b>TN</b> | <b>K</b> | <b>Ca</b> | <b>DO</b> |
|-----------------------------------|-----------|-------------|-----------|------------|------------|-----------|----------------|----------------|-------------|-----------|----------|-----------|-----------|
| summer                            | 0.127     | 9.135       | 0.011     | 9.07       | 2.276      | 2.337     | -0.027         | -2.060         | 1.977       | 3.586     | 3.896    | -22.72    | -0.758    |
| autumn                            | -0.050    | -3.438      | 0.107     | 30.93      | -0.265     | -0.368    | -0.033         | -0.437         | 0.200       | 1.614     | 5.455    | 9.383     | -0.291    |
| winter                            | -0.157    | -9.654      | 0.061     | -40.71     | -1.479     | -1.238    | -0.032         | 1.874          | -1.206      | -2.412    | -4.810   | 12.60     | 0.541     |
| spring                            | 0.080     | 3.957       | -0.179    | 0.71       | -0.532     | -0.731    | 0.092          | 0.622          | -0.970      | -2.788    | -4.542   | 0.742     | 0.509     |
